# Supplementary material for: Tissue transglutaminase exacerbates renal fibrosis via alternative activation of monocyte-derived macrophages
Source: Research Square preprint supplement (doi:10.21203/rs.3.rs-2156542/v1), 2022-10-24
Supplement: Supplementary file 2 [file 95e92ff66fec892d311442ab.docx]

**Supplementary Figure Legends**

**Suppl Figure S1. Example of full-length blots from Fig. 4B.**

The data of western blotting analyses in Fig 4B were cropped for presentation. The blots with the lysates from bone marrow-derived macrophages were analyzed by immunoblotting using anti-TG2 (A), CD206 (B), Arg-1 (C) antibodies. The blot using Anti-β-actin antibody was used as loading controls in each sample (D).

**Suppl Figure S2. Example of full-length blots from Fig. 7A.**

The data of western blotting analyses in Fig 7A were cropped for presentation. The blots with the lysates from THP-1-derived macrophages were analyzed by immunoblotting using anti-phosphorylated STAT6 (A) and STAT-6 (B) antibodies. The blot using Anti-β-actin antibody was used as loading controls in each sample (C).

**Suppl Figure S3. Detection of TG2 substrate proteins incorporated with biotin-pentylamine in THP-1-derived M2 macrophage.**

THP-1 was treated with 150 nM PMA for 24 h. M2 macrophage polarization was induced by 20 ng/ml recombinant human IL-4 with 0.5 mM biotin-pentylamine (BPA) as amine substrate for TG2. Then, the amounts of Gln-donor substrates incorporated with BPA were detected by Western blot using peroxidase-conjugated streptavidin (SA-POD). Anti-β-actin antibody was used as a loading control for each sample.

**Suppl Figure S4. STAT6 inhibitor decreased TG2 expression in THP-1-derived M2 macrophage.**

THP-1 was treated with 150 nM PMA for 24 h. M2 macrophage polarization was induced by 20 ng/ml recombinant human IL-4 in the presence or absence of STAT6 inhibitor (250 nM AS1517499). The protein levels of these samples were analyzed by immunoblotting using anti-TG2, phosphorylated STAT6, and STAT-6 antibodies. The blot using Anti-β-actin antibody was used as loading controls in each sample. (****P* < 0.001, ***P* < 0.01, **P* < 0.05, Student’s t-test).
